# Supplementary material
Source: PubMed Central journal article supplement (PMC7983510)
Supplement: sj-pdf-1-jcb-10.1177_0271678X20931140.pdf [file sj-pdf-1-jcb-10.1177_0271678X20931140.pdf]

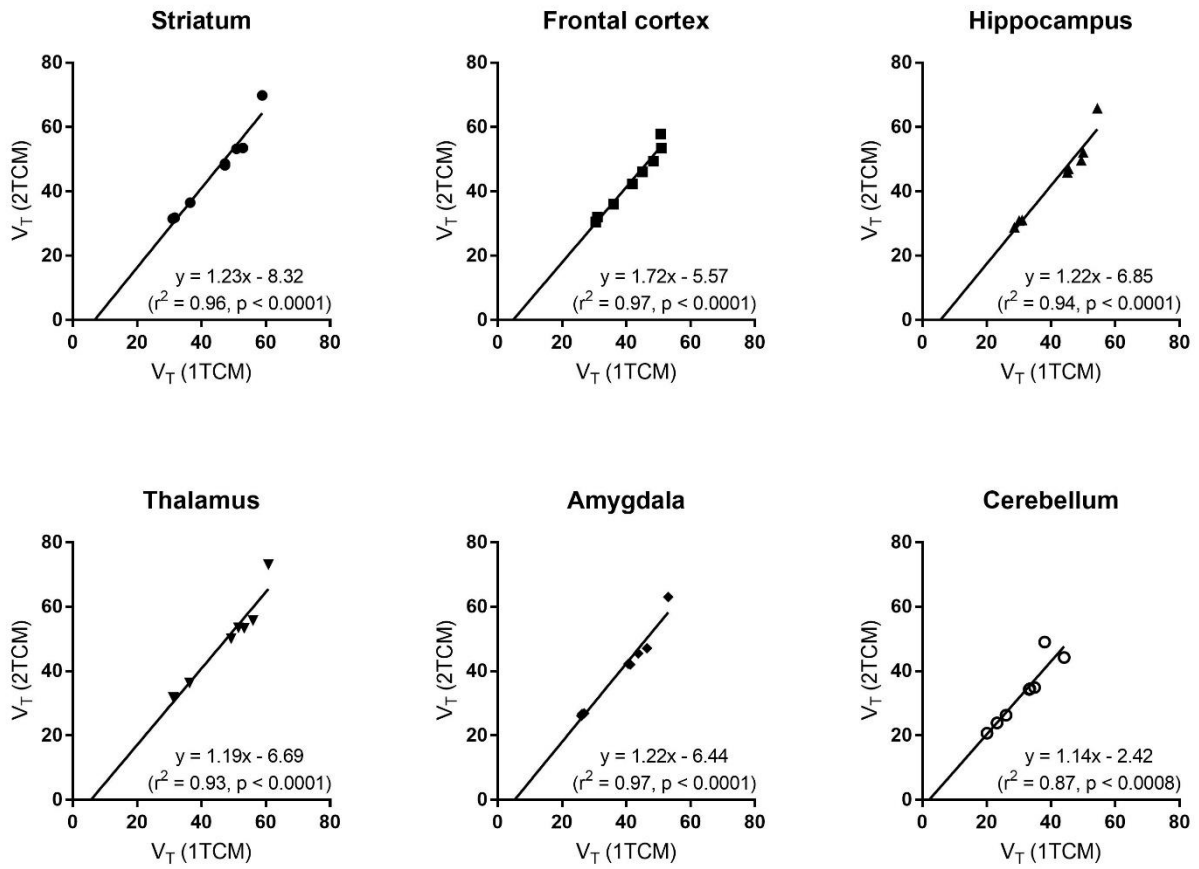

Supplemental Figure 1: Correlation between Volume of Distribution ( $V_T$ ) values derived from the 1TCM and 2TCM in six regions (N=8).

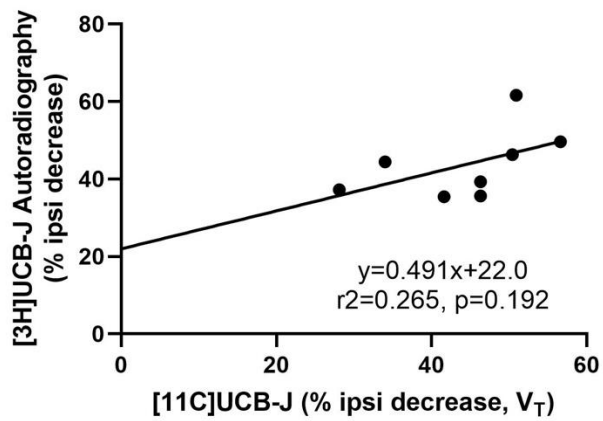

Supplemental Figure 2: Correlation between the *in vitro* autoradiography and the *in vivo* PET asymmetries in rats receiving injections of 20 and 40 micrograms of Quinolinic Acid (QA) in the right striatum (N=8).
